# Supplementary material for: Metformin Reduces the Senescence of Renal Tubular Epithelial Cells in Diabetic Nephropathy via the MBNL1/miR-130a-3p/STAT3 Pathway
Source: Hindawi journal article supplement (doi:10.1155/2020/8708236), 2020-02-10

**Figure 1A**

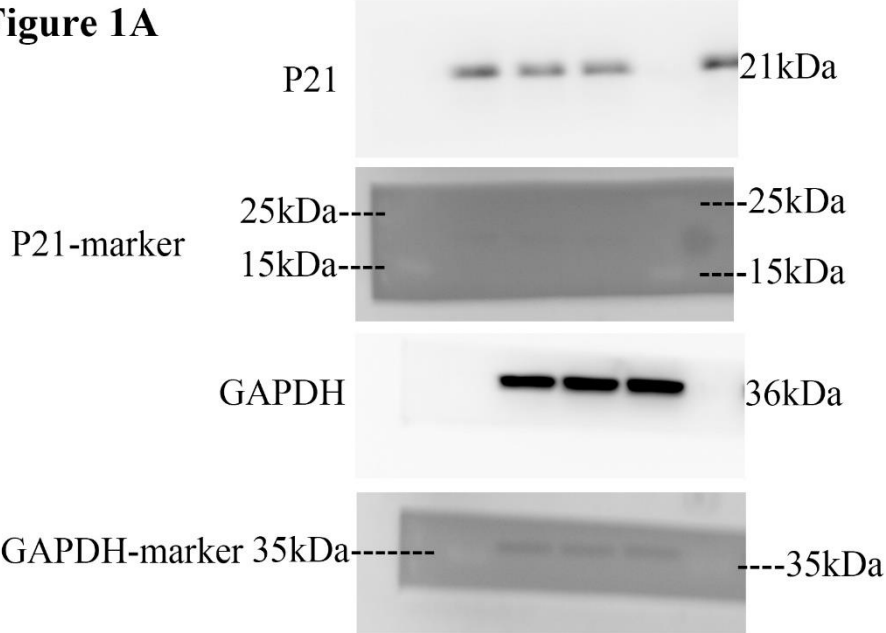

**Figure 1B**

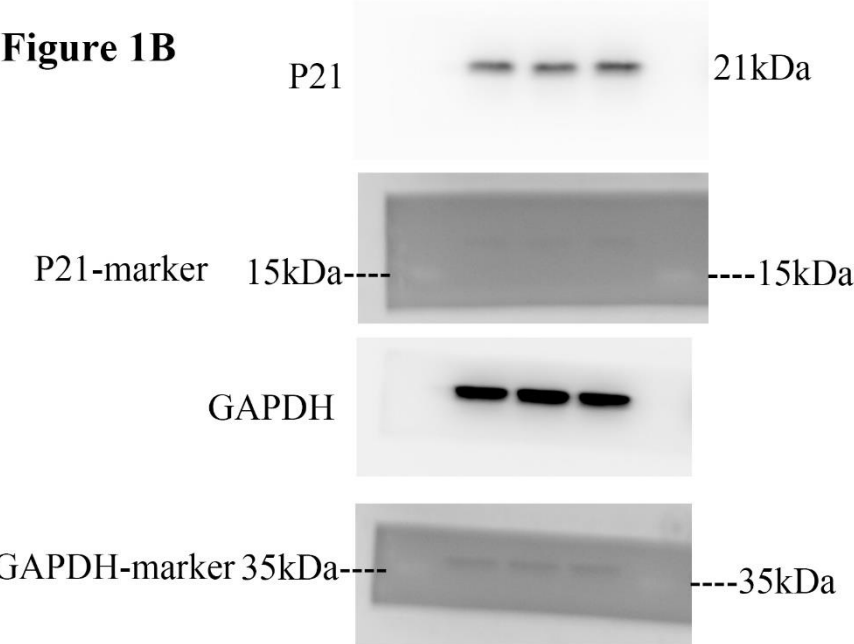

**Figure 1C**

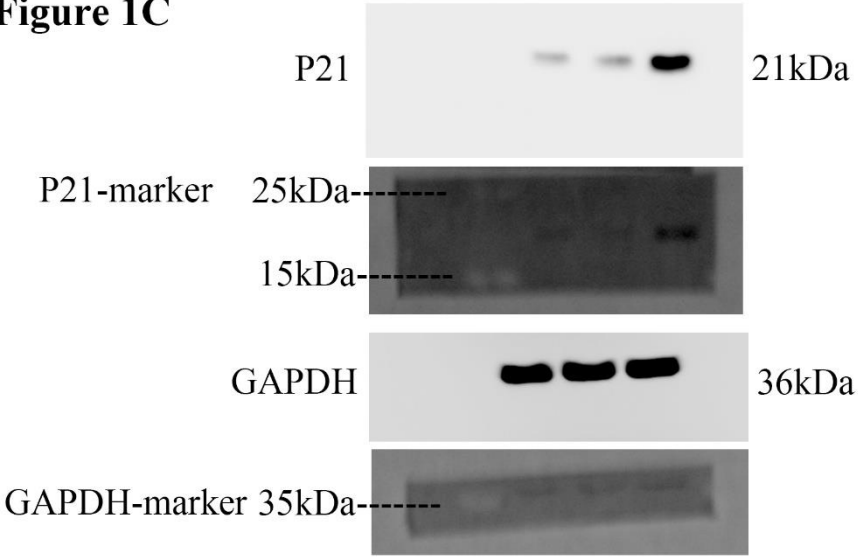

**Figure 1E**

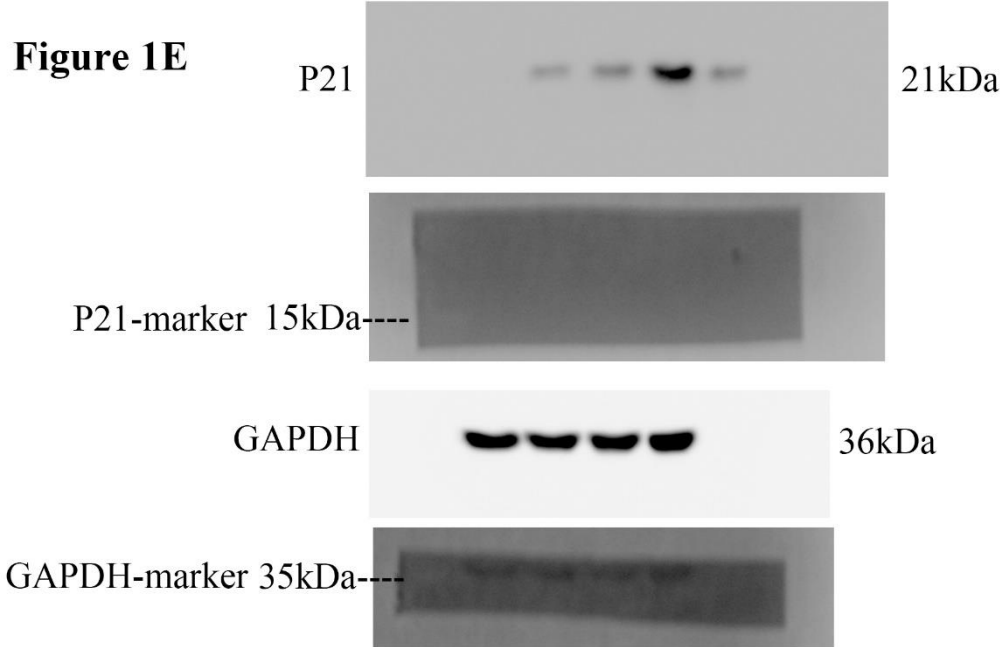

**Figure 2B**

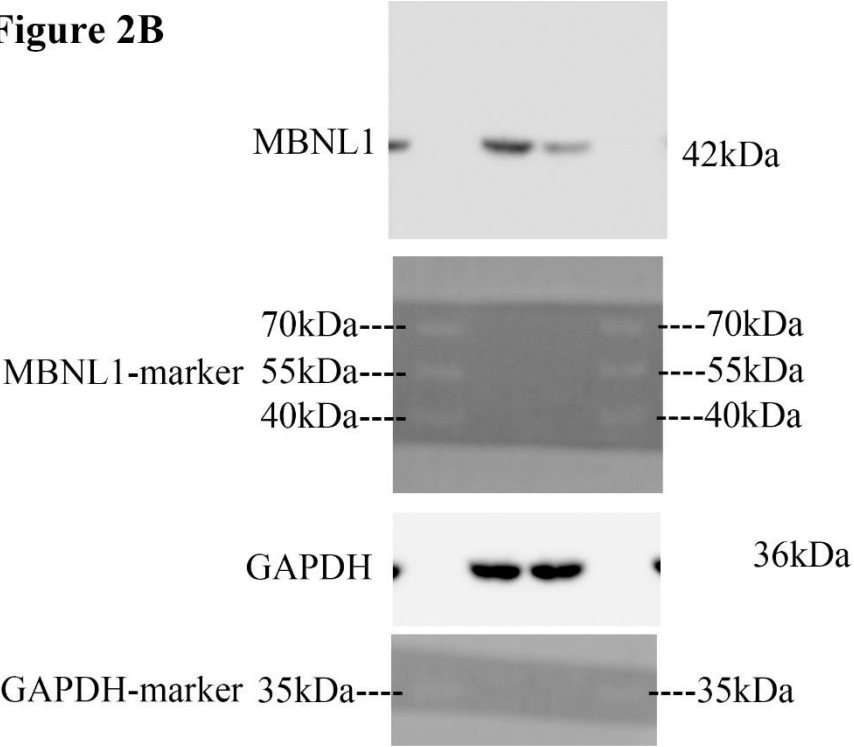

**Figure 2D**

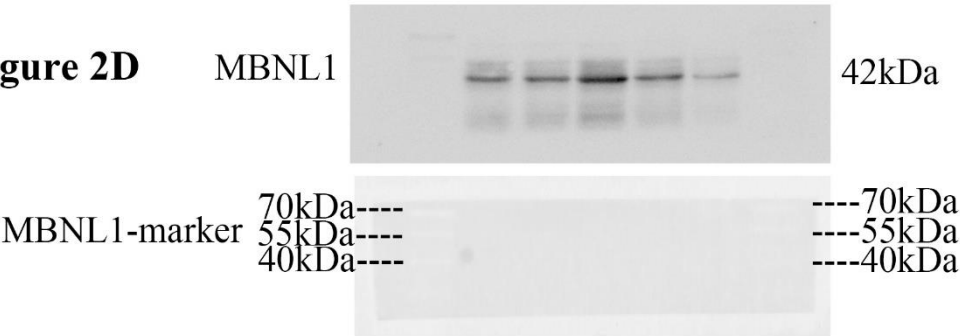

**Figure 2D**

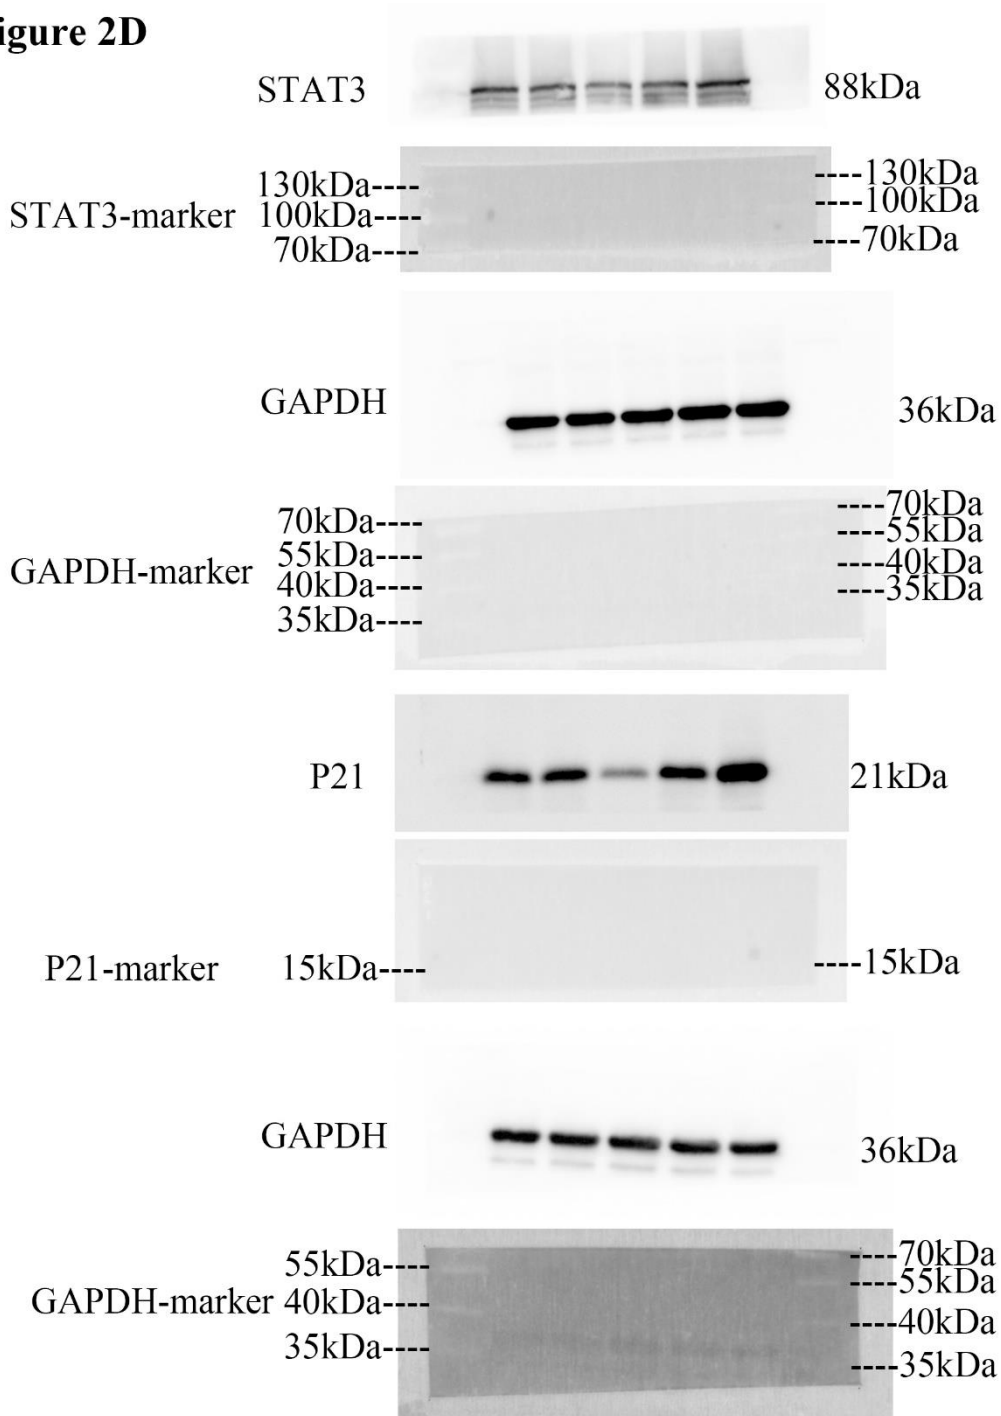

**Figure 2F**

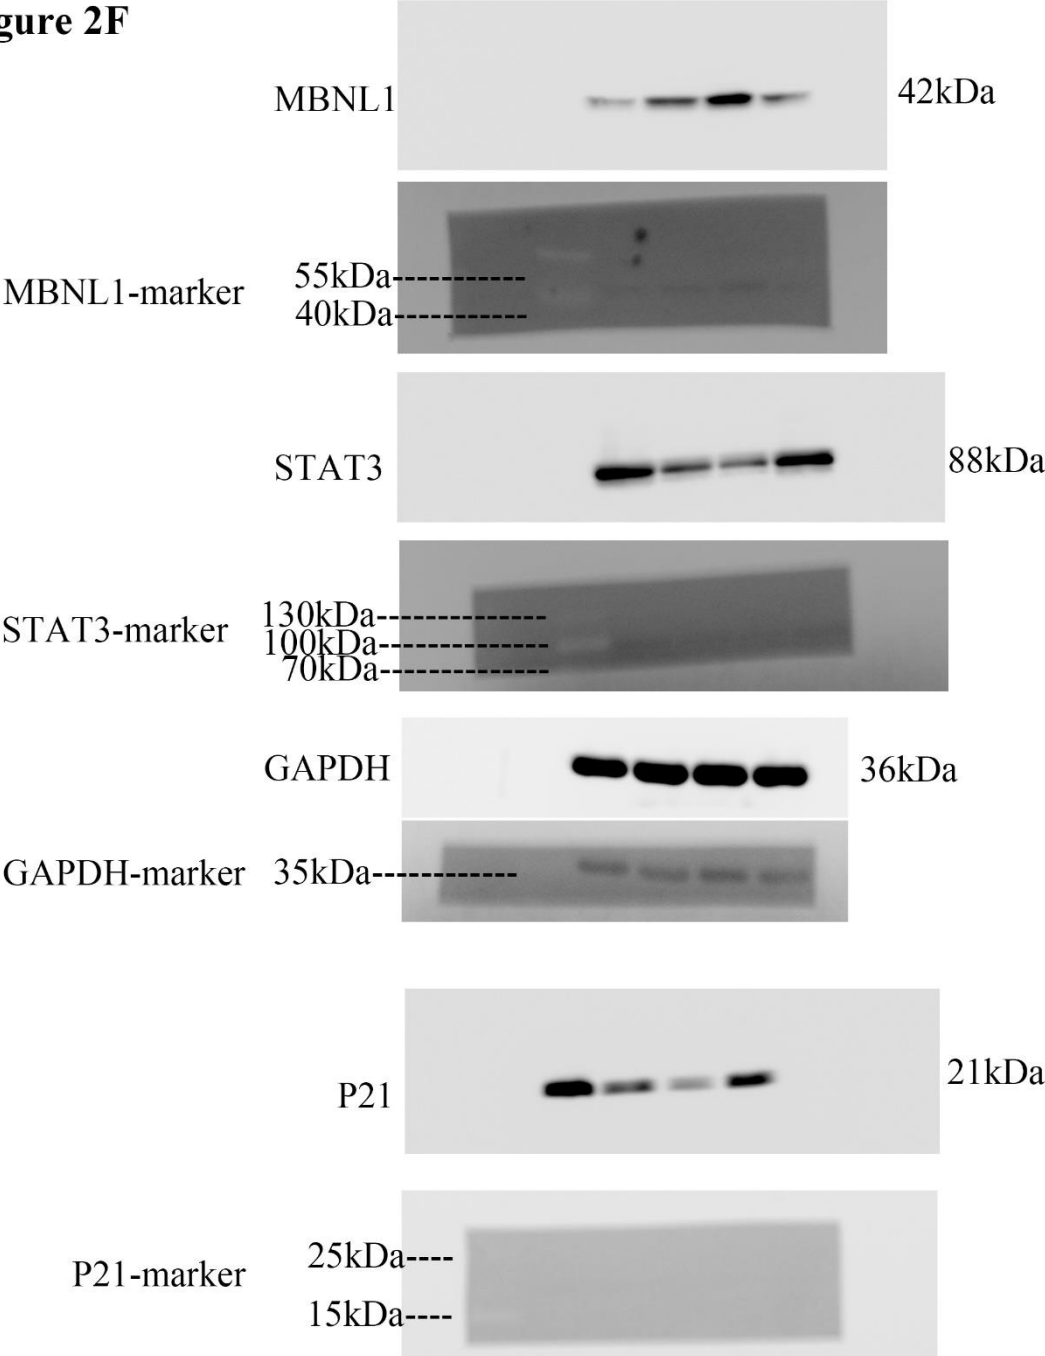

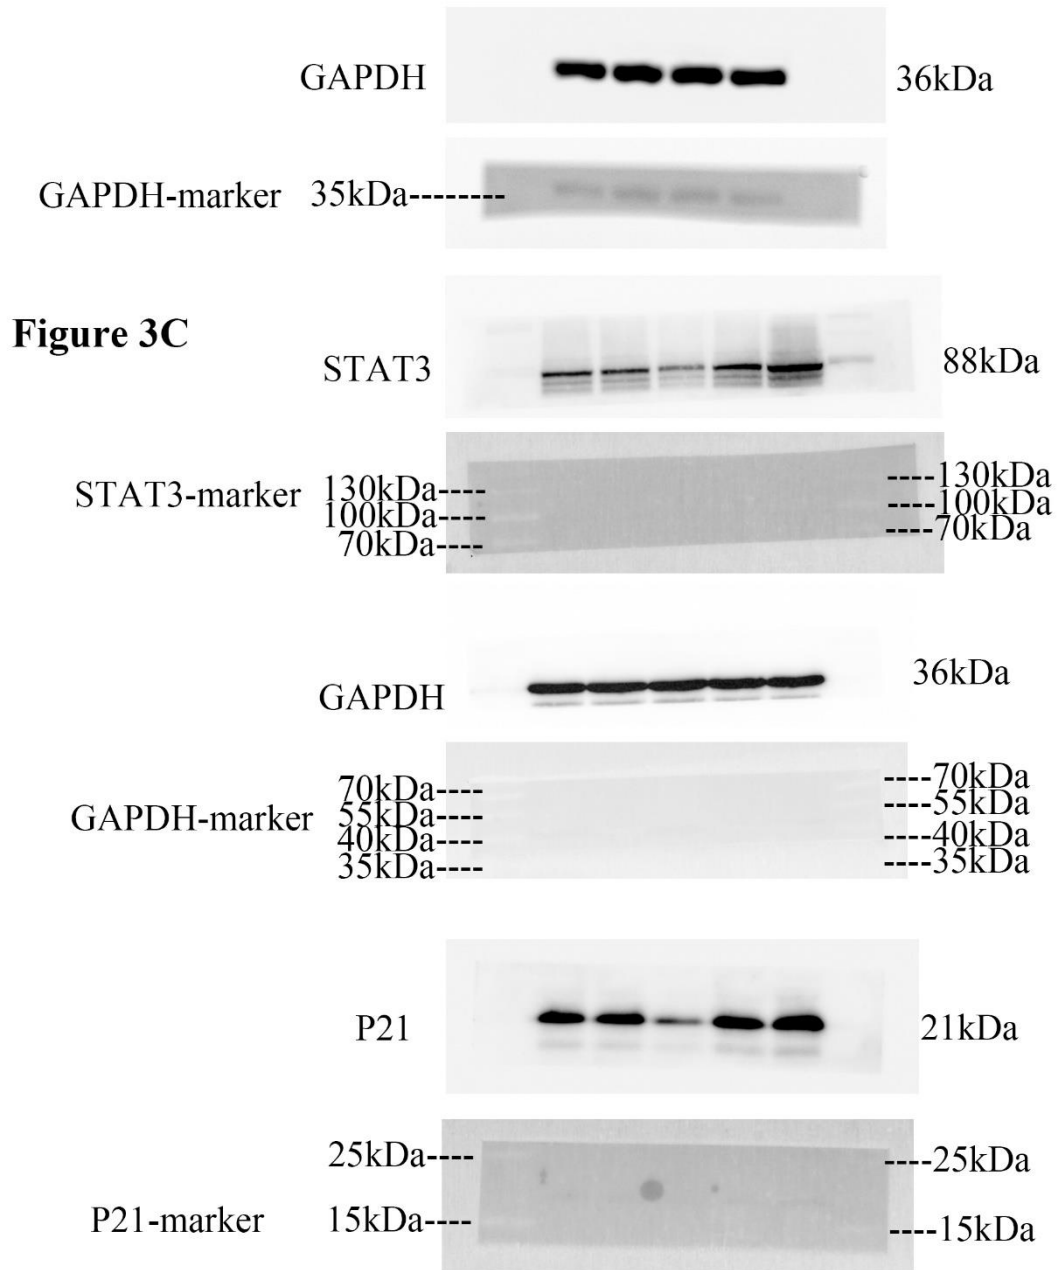

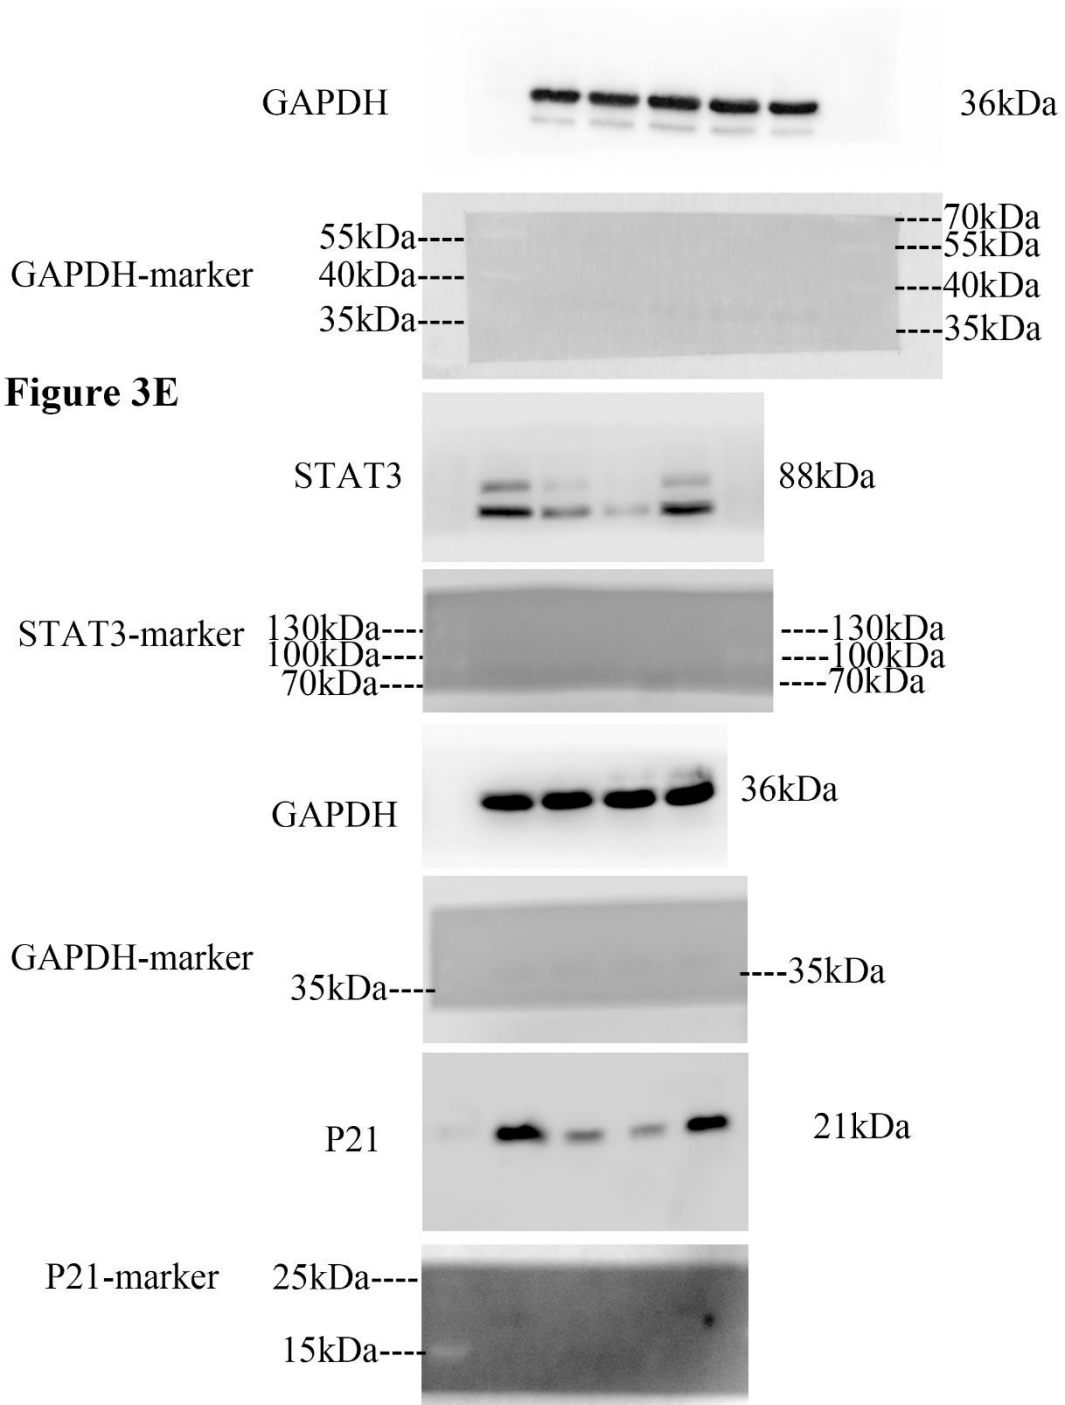

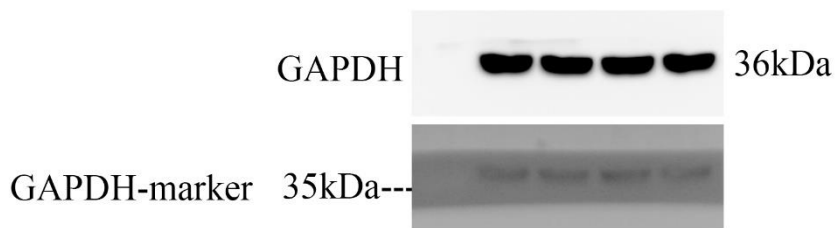

**Figure 4B**

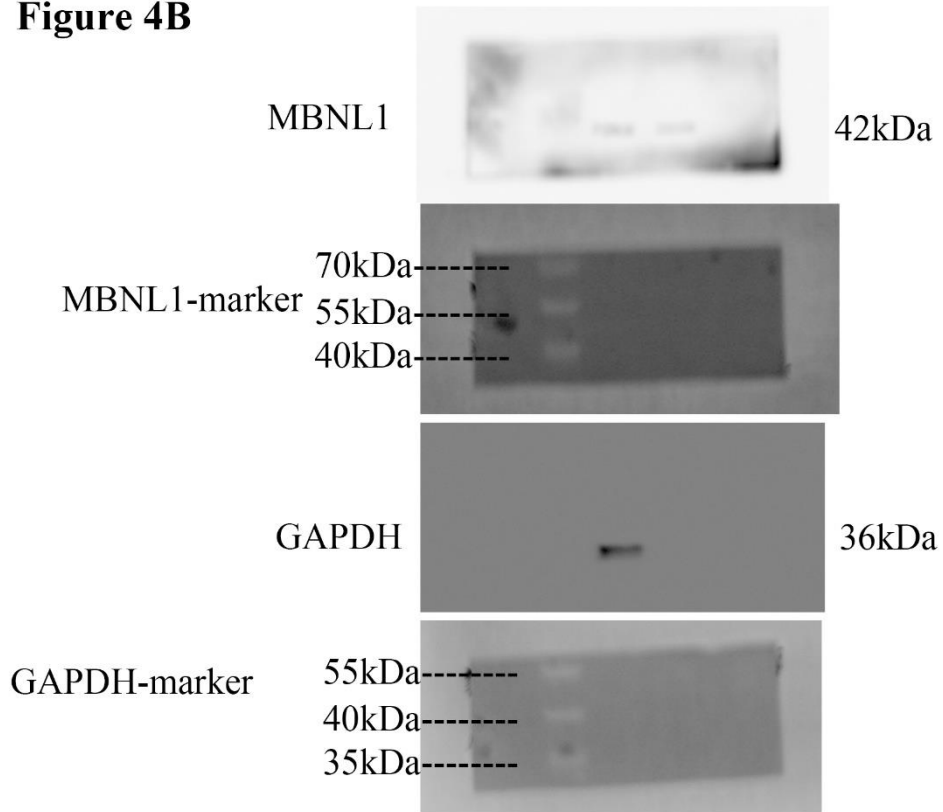

**Figure 4E**

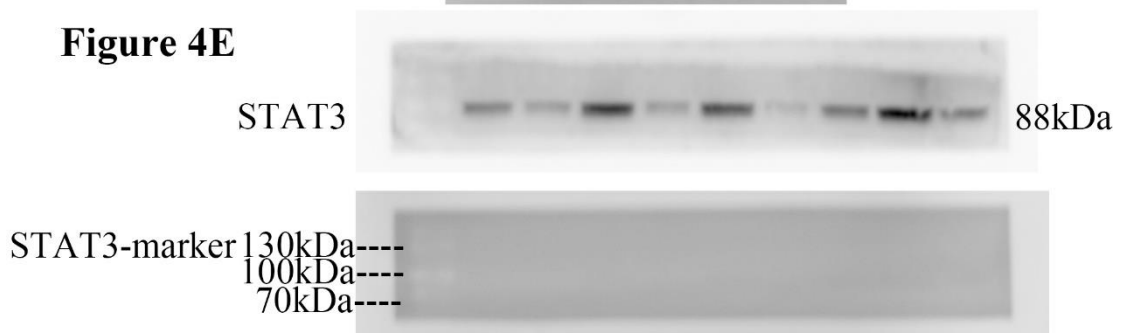



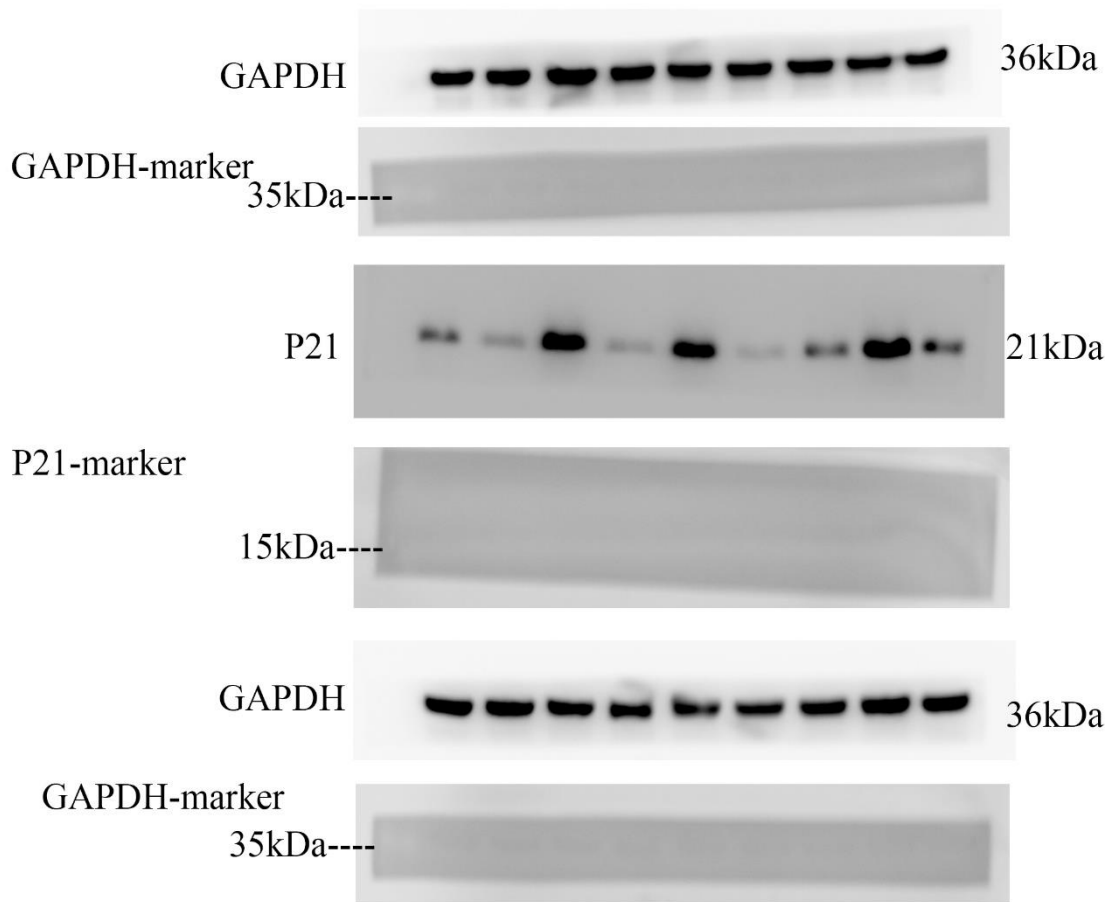

**Figure 4F**

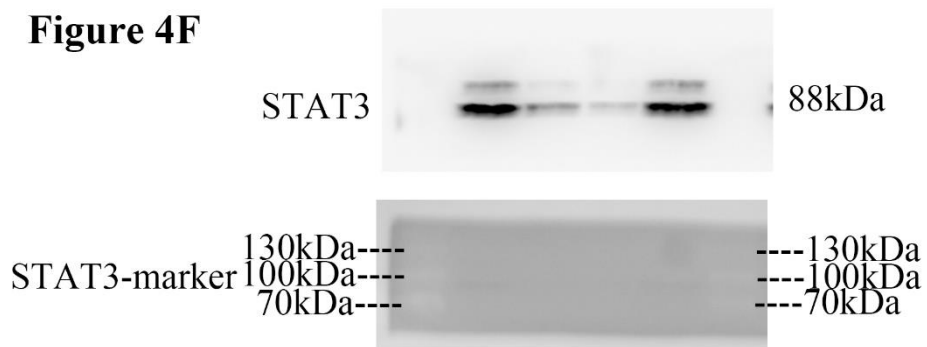

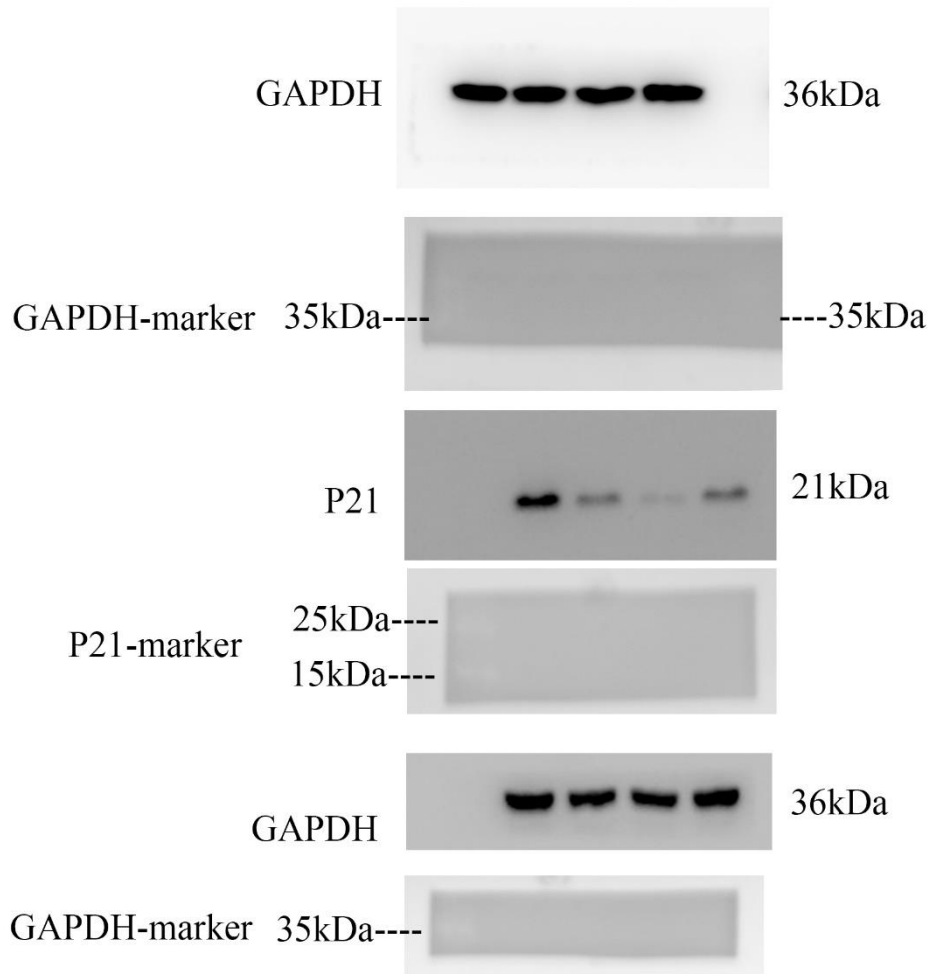

**Figure 5B**

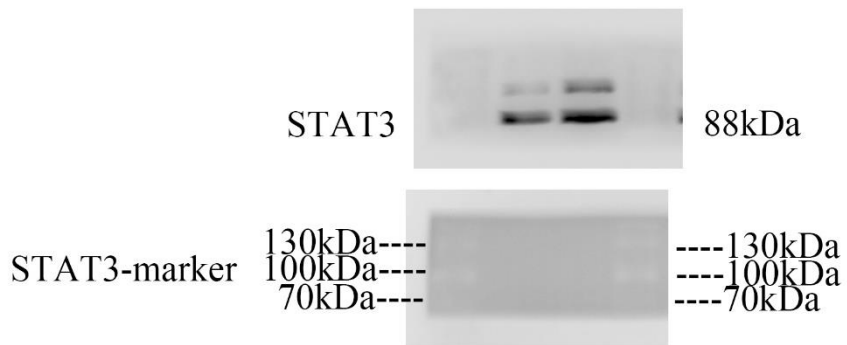

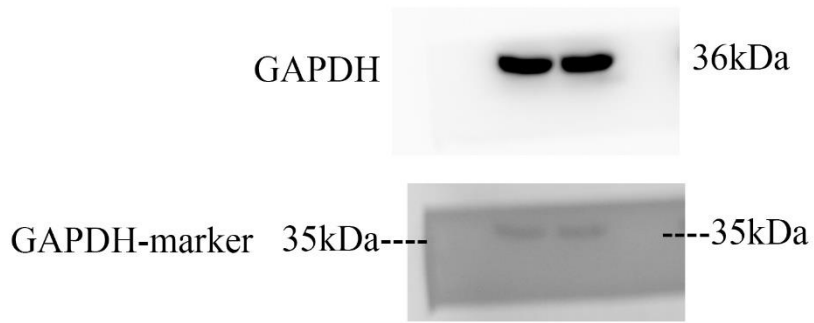

**Figure 5D**

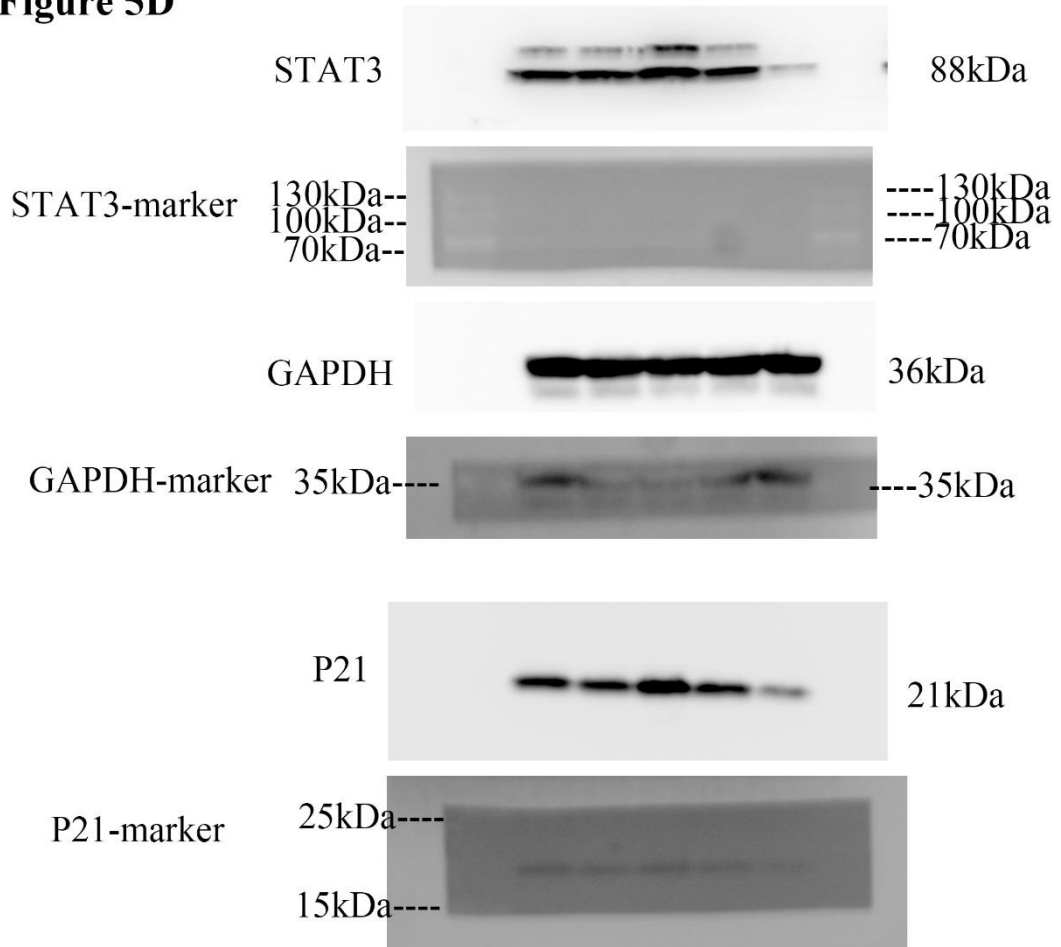

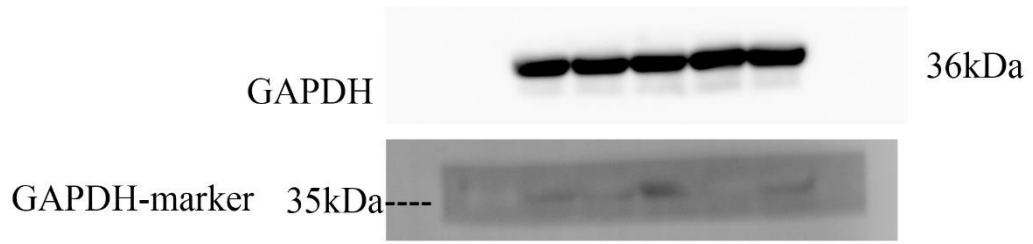

**Figure 5E**

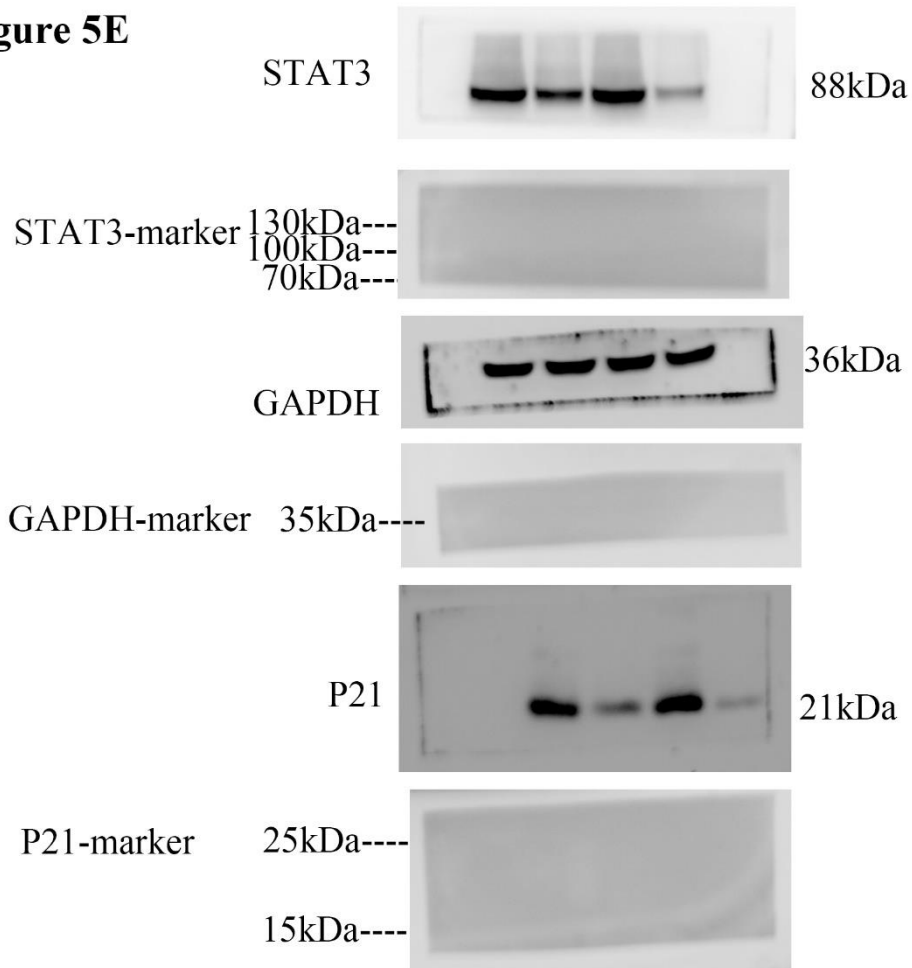

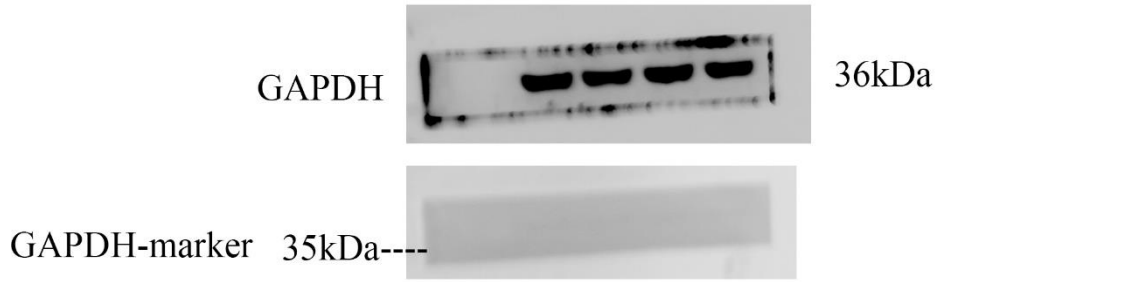

**Figure 5G**

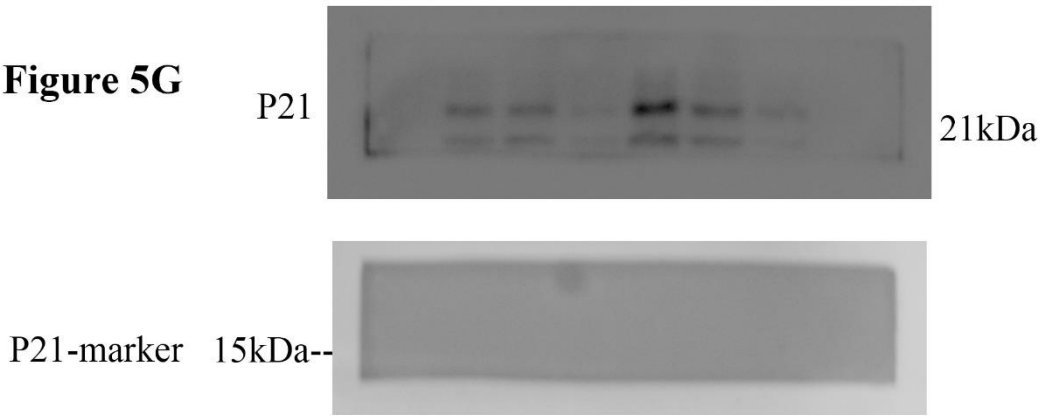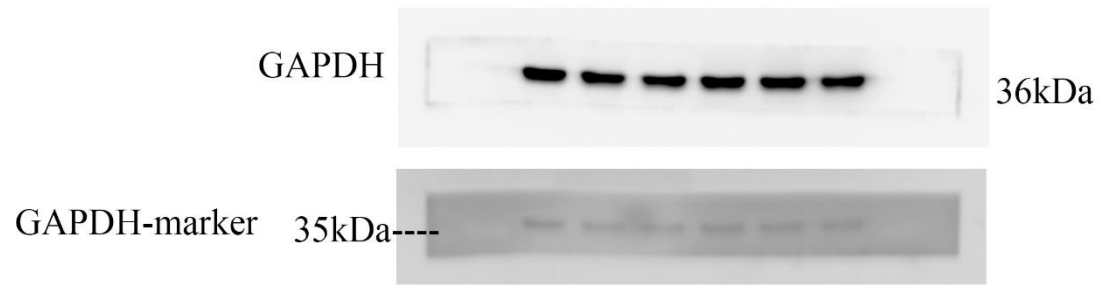

**Figure 6A**

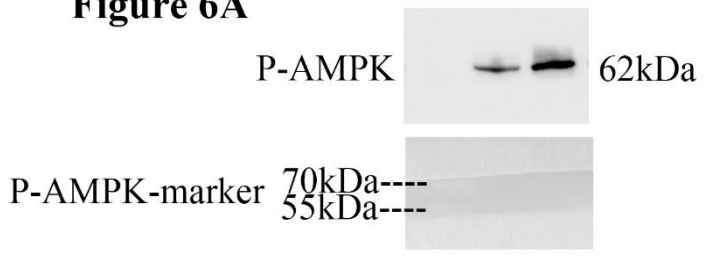

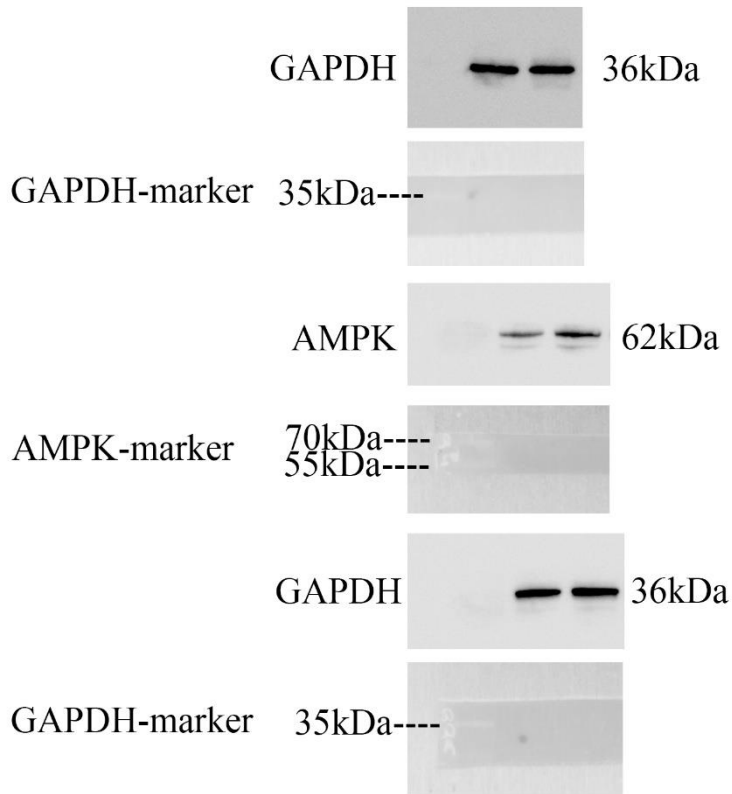

**Figure 6B**

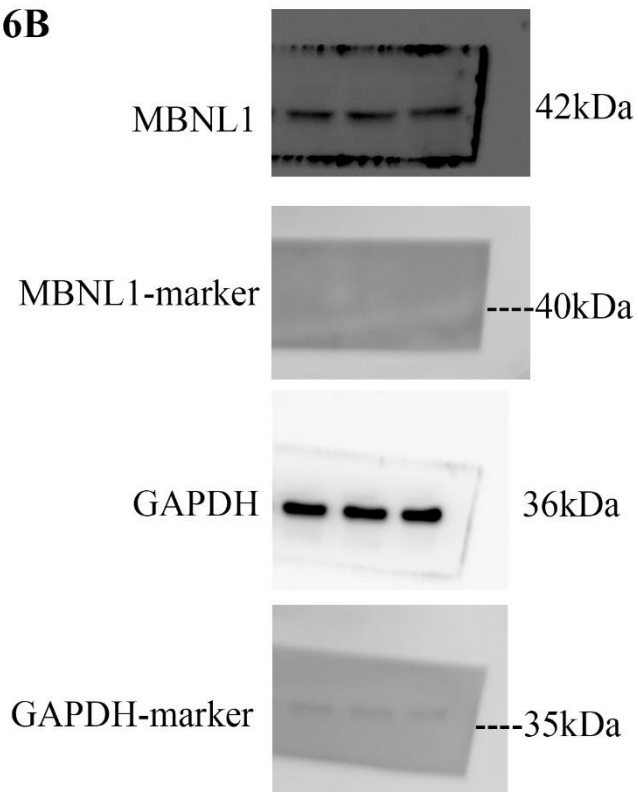

Supplement: f1 [file 8708236.f1.pdf]
